# Supplementary material
Source: publisher figshare collection journal article supplement (https://scielo.figshare.com/articles/dataset/_/5719702)
Supplement: Supplementary file 1 [file Table_1.xls]

## Sheet: Table_1
<b>Base</b>	<b>Author, title of article</b>	<b>Periodic, classification, year and country</b>	<b>Scale</b>	<b>Objectives</b>	<b>Design and level of evidence</b>
MEDLINE	McClish et al<sup>(</sup><a href="#B13">13</a><sup>)</sup>. Health related quality of life in sickle cell patients: the PiSCES project.	Health Qual Life Outcomes (B1), 2005, USA	SF36	To evaluate the QOL of patients with DF participating in The Pain in Sickle Cell Epidemiology Study (PiSCES)	Cohort - groups: asthma, cystic fibrosis and dialysis.Level IV
MEDLINE	Ballas et al<sup>(</sup><a href="#B14">14</a><sup>)</sup>. Hydroxyurea and sickle cell anemia: effect on quality of life.	Health Qual Life Outcomes (B1), 2006, USA	SF36	To evaluate the effect of hydroxyurea (HU) on the quality of life of patients with sickle cell anemia (AF)	Clinical, double-blind, randomized trialLevel II
	Asnani et al <sup>(</sup><a href="#B4">4</a><sup>)</sup>. Component structure of the SF-36 in Jamaicans with sickle cell disease.	West Indian Med J (B1), 2007, Jamaica	SF36	To evaluate the structural component of SF36 in Jamaican patients with DF	Randomized cohort, random sampleLevel IV
	Adams-Graves et al<sup>(</sup><a href="#B5">5</a><sup>)</sup>. Development and validation of SIMS: an instrument for measuring quality of life of adults with sickle cell disease.	Am J Hematol (A1)2008 USA	SIMS	To develop the Sickle Disease Impact Measurement Scale (SIMS), an instrument to measure the quality of life of adults with DF	Case control - creation and testing of scale with two groups.Level IV
	Asnani et al<sup>(</sup><a href="#B1">1</a><sup>)</sup>. Quality of life in patients with sickle cell disease in Jamaica: rural-urban differences.	Rural Remote Health2008 Jamaica	SF-36	To know the differences between the QOL of patients with FD who live in urban and rural areas	Analytical observational Level IV
	Asnani et al<sup>(</sup><a href="#B15">15</a><sup>)</sup>. Utility of WHOQOL-BREF in measuring quality of life in sickle cell disease.	Health Qual Life Outcomes2009 Jamaica	WHOQOL Bref	To study the usefulness of WHOQOL-Bref in the QOL measurement of patients with DF	Control caseLevel IV
	van Tuijn et al<sup>(</sup><a href="#B16">16</a><sup>)</sup>. Pain rate and social circumstances rather than cumulative organ damage determine the quality of life in adults with sickle cell disease	Am J Hematol (A1), 2010, Netherlands	SF36	To evaluate prospectively (5 years) QoL in a cohort of patients with FD, related to chronic organ damage, pain rate and history of complications related to the disease	Cohort Level IV
	Dampier et al<sup>(</sup><a href="#B17">17</a><sup>)</sup>. Health-related quality of life in adults with sickle cell disease (SCD): a report from the comprehensive sickle cell centers clinical trial consortium.	Am J Hematol (A1), 2011, USA	SF36	To examine the relationship between the various complications related to FD and quality of life (QoL)	Cohort Level IV
	Anie et al<sup>(</sup><a href="#B18">18</a><sup>)</sup>. Patient self-assessment of hospital pain, mood and health-related quality of life in adults with SCD	BMJ Open (B1), 2012, USA	EQ-5D	Characterize the relationship of pain with mood and QOL at admission, before discharge and at one post-discharge week	Transversal Level VI
	Ohara et al<sup>(</sup><a href="#B19">19</a><sup>)</sup>. Musculoskeletal pain, profile and quality of life of individuals with SCD.	Rev. bras. Fisioter (B1)2012 Brazil	WHOQOL Breef	To verify the relationship between musculoskeletal pain, considering its body location, social, economic and QoL characteristics in individuals with DF	Transversal Level VI
	Al Jaouni et al<sup>(</sup><a href="#B20">20</a><sup>)</sup>. Treatment adherence and quality of life outcomes in patients with SDC	Saudi Med J (B3), 2013, Saudi Arabia	WHOQOL Breef	To evaluate the HRQOL of patients with FD and to measure the impact of adherence to treatment on the complications of the disease, severity, crises, and outcomes	Transversal Level VI
	Keller et al<sup>(</sup><a href="#B7">7</a><sup>)</sup>. Patient reports of health outcome for adults living with sickle cell disease: development and testing of the ASCQ-Me item banks.	Health Qual Life Outcomes (B1), 2014, USA	ASCQ-Me	Develop Adult Sickle Cell Quality of Life Measurement System (ASCQ-Me)	Transversal Level VI
	Ahmed et al<sup>(</sup><a href="#B21">21</a><sup>)</sup>. Health Qual Life Outcomes Health- related quality of life in patients with sickle cell disease in Saudi Arabia.	Health Qual Life Outcomes (B1), 2015. Saudi Arabia	SF36	Describe the characteristics of Saudi patients with FD and their impact on QoL	Transversal Level VI
LILACS	Pereira et al<sup>(</sup><a href="#B22">22</a><sup>)</sup>. Sickle cell disease and quality of life: a study on the subjective perception of patients from the Fundação Hemominas, Minas Gerais, Brasil.	Rev. bras. Hematol Hemoter (B3), 2008, Brazil	WHOQOL Breef	To investigate whether the concept of QoL advocated by the World Health Organization (WHO) could be used for patients with DF	Qualitative VI
	Roberti et al<sup>(</sup><a href="#B3">3</a><sup>)</sup>. Avaliação da qualidade de vida em portadores de doença falciforme do Hospital das Clínicas de Goiás, Brasil.	Rev. bras. Hematol Hemoter (B3), 2010, Brazil	WHOQOL Breef	To evaluate the QOL of patients with sickle cell disease treated at Hospital das Clínicas, Universidade de Goiás	Transversal Level VI
	Santos et al<sup>(</sup><a href="#B23">23</a><sup>)</sup>. Sociodemographic aspects and quality of life of patients with SCA.	Rev. bras. Hematol Hemoter (B3), 2013, Brazil	SF36	To describe the sociodemographic profile and the impact of the disease on the QOL of patients with AF	Transversal Level VI
	Losilla et al<sup>(</sup><a href="#B24">24</a><sup>)</sup>. Evaluating quality of life in patients with sickle cell disease: Differences between adults and children.	Medicina (RP) (B4), 2013, Brazil	WHOQOL Breef	To describe and analyze the QoL of patients with sickle cell anemia at a hematology clinic of a school hospital in the Southeast Region, Brazil	Transversal Level VI
	Pereira et al<sup>(</sup><a href="#B25">25</a><sup>)</sup>. Sickle Cell Disease: quality of life in patients with hemoglobin SS and SC disorders.	Rev. bras. Hematol Hemoter (B3), 2013, Brazil	WHOQOL Breef	To evaluate the QoL of patients with DF (HbSS and HbSC) and their clinical and sociodemographic characteristics	Transversal Level VI
	Mastandréa et al<sup>(</sup><a href="#B26">26</a><sup>)</sup>. The relationship between genotype, psychiatric symptoms and quality of life in adult patients with sickle cell disease in São Paulo, Brazil: a cross-sectional study.	São Paulo Med J (B2), 2015, Brazil	SF36	To describe the psychiatric symptomatology present in the Brazilian patient with sickle cell disease and to evaluate the relationship of these symptoms with the genotype of the disease and the subject's HRQL	Transversal Level VI
	Martínez-Triana et al<sup>(</sup><a href="#B27">27</a><sup>)</sup>. Efecto de la drepanocitosis sobre la calidad de vida.	Rev. cuba Hematol, Inmunol Hemoter (SI), 2015, Cuba	SF36	To determine the HRQoL of adult patients with DF who receive care at the Institute of Hematology and Immunology (IHI)	Control case IV
CUMED	Martínez-Triana et al<sup>(</sup><a href="#B2">2</a><sup>)</sup>. Cuestionario para evaluar la calidad de vida relacionada con la salud de adultos con drepanocitosis.	Rev. cuba Hematol, Inmunol Hemoter (SI), 2012, Cuba	CEB-S	Development and validation of a specific questionnaire to evaluate the QOL of patients with DF (CEB-S)	Control case Level IV
SCIELO	Vilela et al<sup>(</sup><a href="#B28">28</a><sup>)</sup>. Quality of life of individuals with sickle cell disease followed at referral centers in Alagoas, Brasil.	Rev. bras. Hematol Hemoter (B3), 2012, Brazil	SF36	To evaluate the HRQoL of individuals with FD followed at reference centers in Alagoas, Brazil	Transversal Level VI
