# Supplementary material
Source: publisher figshare collection journal article supplement (https://scielo.figshare.com/articles/dataset/_/5719702)
Supplement: Supplementary file 2 [file Table_2.xls]

## Sheet: Table_2
<b>Patients who presented lower health-related quality of life scores</b>	<b>Patients who presented higher health-related quality of life scores</b>
- symptomatic (n = 1)<sup>(</sup><a href="#B2">2</a><sup>)</sup><br>- who had frequent painful crises (n = 9)<sup>(</sup><a href="#B2">2</a><sup>,</sup><a href="#B13">13</a><sup>-</sup><a href="#B15">15</a><sup>-</sup><a href="#B19">19</a><sup>,</sup><a href="#B25">25</a><sup>,</sup><a href="#B28">28</a><sup>)</sup><br> - with severe form of the disease (n = 8)<sup>(</sup><a href="#B1">1</a><sup>…	- with double heterozygosity (HbSC) (n = 3)<sup>(</sup><a href="#B1">1</a><sup>,</sup><a href="#B17">17</a><sup>,</sup><a href="#B26">26</a><sup>)</sup><br>- with less severe forms of sickle cell disease (n = 3)<sup>(</sup><a href="#B1">1</a><sup>,</sup><a href="#B7">7</a><sup>,</sup><a href="#B17">17</a><sup>)</sup><br>- who lived in rural areas (n = 1)<sup>(</sup><a href="#B1">1</a><sup>)</sup>…
